# Supplementary material for: CD95 gene deletion may reduce clonogenic growth and invasiveness of human glioblastoma cells in a CD95 ligand-independent manner
Source: PubMed Central journal article supplement (PMC9338300; doi:10.1038/s41420-022-01133-y), 2022-07-29
Supplement: 41420_2022_1133_MOESM1_ESM.pdf [file 41420_2022_1133_MOESM1_ESM.pdf]

Please complete the table below to indicate the contributions of all named authors to the figures.

Figure 1:

|  |
|--|
|  |
|--|

Figure 2:

|  |
|--|
|  |
|--|

Figure 3:

|  |
|--|
|  |
|--|

Figure 4:

|  |
|--|
|  |
|--|

Figure 5:

|  |
|--|
|  |
|--|

Figure 6:

|  |
|--|
|  |
|--|

Signed for and on behalf of the Author(s):

Clara Quijano-Rubio, Manuela Silgner and Michael Weller

Print Name:

|  |
|--|
|  |
|--|

Date:

|  |
|--|
|  |
|--|
